# Supplementary material
Source: PubMed Central journal article supplement (PMC4922520)
Supplement: DS_10.1177_1941738116650389.pdf [file DS_10.1177_1941738116650389.pdf]

### Appendix. Diagnostic Codes Used for Identification of Services Provided

| Service                 | ICD9 Code / ICD Procedure Codes                                                                                                                                                                            |
|-------------------------|------------------------------------------------------------------------------------------------------------------------------------------------------------------------------------------------------------|
| <b>Office visits</b>    | 99024, 99201, 99202, 99203, 99204, 99205, 99211, 99212, 99213, 99214, 99215, 99241, 99242, 99243, 99244, 99245                                                                                             |
| <b>Elbow injection</b>  | 24220, 20550, 20551, 20552, 20553, 20600, 20605, 20606 / 81.92, 83.97, 83.98                                                                                                                               |
| <b>Physical therapy</b> | 97001, 98926                                                                                                                                                                                               |
| <b>Radiographs</b>      | 73070, 73080                                                                                                                                                                                               |
| <b>MRI</b>              | 73218, 73219, 73220, 73221, 73222, 73223                                                                                                                                                                   |
| <b>Surgery</b>          | 24006, 24101, 24102, 24350, 24351, 24352, 24354, 24356, 24357, 24358, 24359, 29830, 29834, 29835, 29836, 29837, 29838 / 80.12, 80.22, 80.42, 80.92, 81.93, 83.01, 83.02, 83.13, 83.42, 83.72, 83.73, 83.74 |

ICD, International Classification of Diseases; MRI, magnetic resonance imaging.
